# Supplementary material for: A Mechanism of Gene Amplification Driven by Small DNA Fragments
Source: PubMed Central journal article supplement (PMC3521702; doi:10.1371/journal.pgen.1003119), 2012-12-13

Figure S2

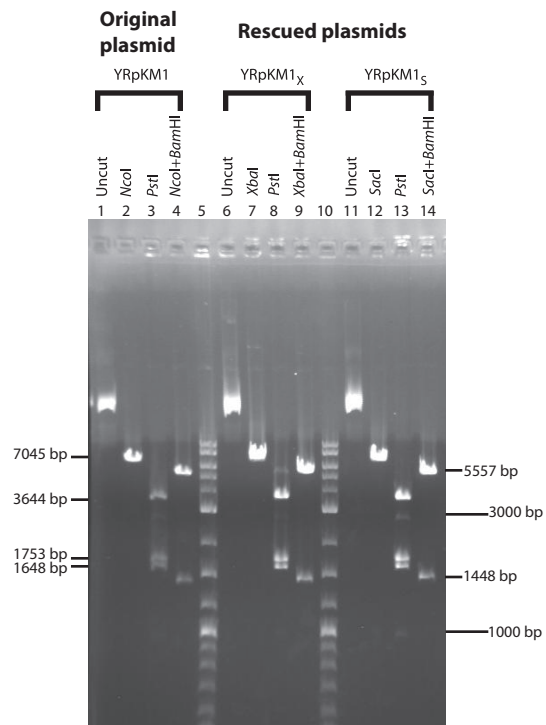

Supplement: pgen.1003119.s002.pdf [file pgen.1003119.s002.pdf]
