# Supplementary material for: A Mechanism of Gene Amplification Driven by Small DNA Fragments
Source: PubMed Central journal article supplement (PMC3521702; doi:10.1371/journal.pgen.1003119), 2012-12-13
Supplement: pgen.1003119.s005.pdf [file pgen.1003119.s005.pdf]

**Table S1. Oligos used in this study.**

| Name                | Site        | Size | Sequence                                                                                         |
|---------------------|-------------|------|--------------------------------------------------------------------------------------------------|
| AB                  | <i>NcoI</i> | 80   | 5'GGCGGATAATGCCTTTAGCGGCTTAACTGTGCCCT <b>CCATGG</b> AAAAATCAGTCAAGATATCCACATGTGTT<br>TTAGTAAAC   |
| CD                  | <i>NcoI</i> | 80   | 5'GTTTACTAAAAACACATGTGGATATCTTGACTGATTTTT <b>CCATGG</b> AGGGCACAGTTAAGCCGCTAAAGGC<br>ATTATCCGCC  |
| AB <sub>s</sub>     | <i>SacI</i> | 80   | 5'GGCGGATAATGCCTTTAGCGGCTTAACTGTGCCCT <b>GAGCTC</b> AAAAATCAGTCAAGATATCCACATGTGTTT<br>TTAGTAAAC  |
| CD <sub>s</sub>     | <i>SacI</i> | 80   | 5'GTTTACTAAAAACACATGTGGATATCTTGACTGATTTTT <b>GAGCTC</b> GAGGGCACAGTTAAGCCGCTAAAGGC<br>ATTATCCGCC |
| AB <sub>x</sub>     | <i>XbaI</i> | 80   | 5'GGCGGATAATGCCTTTAGCGGCTTAACTGTGCCCT <b>TCTAGA</b> AAAAATCAGTCAAGATATCCACATGTGTTT<br>TTAGTAAAC  |
| CD <sub>x</sub>     | <i>XbaI</i> | 80   | 5'GTTTACTAAAAACACATGTGGATATCTTGACTGATTTTT <b>TCTAGA</b> GAGGGCACAGTTAAGCCGCTAAAGGC<br>ATTATCCGCC |
| A20B60 <sub>s</sub> | <i>SacI</i> | 80   | 5'AAGAGTAAAAAATTGTACTTGGCGGATAATGCCTTTAGCGGCTTAACTGTGCCCT <b>GAGCTC</b> AAAAATCAG<br>TCAAGATATC  |
| C60D20 <sub>s</sub> | <i>SacI</i> | 80   | 5'GATATCTTGACTGATTTTT <b>GAGCTC</b> GAGGGCACAGTTAAGCCGCTAAAGGCATTATCCGCCAAGTACAATT<br>TTTACTCTT  |
| e1                  |             | 80   | 5'TCCGAAGCTGGCCAATTGATACAATTAATTGACATCAGCAGACAGCAAATGCACTTGATATACGCAGCTT<br>AAAGCAAGGG           |
| f1                  |             | 80   | 5'CCCTTGCTTTAAGCTGCGTATATCAAGTGCATTTGCTGTCTGCTGATGTCAATTAATTGTATCAATTGGCCA<br>GCTTCGGA           |
| R1                  |             | 80   | 5'GTTGTATATACCACTACTCTGTGATTTTTTTTCACTCTTGGGAAGGAAAGAAAAAGTAAAAACATCAACTG<br>GTAAGTGTC           |
| R2                  |             | 80   | 5'GACACTTACCAGTTGATGTTTTCACTTTTTCTTCCCTCCCAAGAGTGAAAAAAAATCACAGAGTAGTGGT<br>ATATACAAC            |
| Trp5.A3-F           |             | 80   | 5'GTCTAAGAGAGTTGGAAAAGGGTTTTGATGAAGCTGTCGCCATGGAGGGCACAGTTAAGCCGCTAAAGG<br>CATTATCCGCC           |
| Trp5.A3-R           |             | 80   | 5'GGCGGATAATGCCTTTAGCGGCTTAACTGTGCCCTCCATGGCGACAGCTTCATCAAAACCTTTTCCA<br>CTCTTAGAC               |
| Trp5.UR-F           |             | 80   | 5'GTTTACTAAAAACACATGTGGATATCTTGACTGATTTTTCCGATCCACATTCTGGGAAGACTTCAAATCC<br>TTGTATTCT            |
| Trp5.UR-R           |             | 80   | 5'AGAATACAAGGATTTGAAGTCTTCCAGAAATGTGGGATCGGAAAAATCAGTCAAGATATCCACATGTGTT<br>TTAGTAAACA           |

The structures of the oligos used in this study are described from the 5' end, with restriction endonuclease site sequences shown in bold and underlined. The presence of the *SacI* site within the AB<sub>s</sub> and CD<sub>s</sub> oligo sequence changes the 69<sup>th</sup> serine codon (TCC) of *URA3* and the 70<sup>th</sup> methionine codon (ATG) to glutamine (GAG) and leucine (CTC), respectively. The presence of the *XbaI* site within the AB<sub>x</sub> and CD<sub>x</sub> oligo sequence creates a silent mutation on codon 69<sup>th</sup> serine of *URA3* (TCC to TCT) and changes the 70<sup>th</sup> codon methionine to arginine codon (ATG to AGA). These changes into the *URA3* coding sequence do not alter the functionality of the Ura3 protein.
