# Supplementary material for: A Mechanism of Gene Amplification Driven by Small DNA Fragments
Source: PubMed Central journal article supplement (PMC3521702; doi:10.1371/journal.pgen.1003119), 2012-12-13
Supplement: pgen.1003119.s006.pdf [file pgen.1003119.s006.pdf]

**Table S2. Yeast strains used in this study.**

| Name    | Relevant genotype                                                                                                                           | Source               |
|---------|---------------------------------------------------------------------------------------------------------------------------------------------|----------------------|
| FRO-155 | <i>MAT<math>\alpha</math> his3<math>\Delta</math>1 leu2<math>\Delta</math>0 lys2<math>\Delta</math>0 trp5::GSHU lys2::AluIR<sup>a</sup></i> | Storici et al., 2003 |
| KM-193  | FRO-155, GSHU::A3-UR <sup>b</sup>                                                                                                           | This work            |
| KM-196  | FRO-155, GSHU::A3-UR                                                                                                                        | This work            |
| KM-201  | KM-193, UR- <i>LEU2</i> <sup>c</sup>                                                                                                        | This work            |
| KM-203  | KM-196, UR- <i>LEU2</i>                                                                                                                     | This work            |
| KM-209  | KM-193, UR:: <i>LEU2</i>                                                                                                                    | This work            |
| KM-211  | KM-193, UR:: <i>LEU2</i>                                                                                                                    | This work            |
| KM-221  | KM-201, GSHdw <sup>d</sup>                                                                                                                  | This work            |
| KM-222  | KM-203, GSHdw                                                                                                                               | This work            |
| KM-257  | KM-201, GSHup <sup>e</sup>                                                                                                                  | This work            |
| KM-259  | KM-203, GSHup                                                                                                                               | This work            |
| KM-261  | KM-221, <i>rad52<math>\Delta</math>::kanMX4</i> <sup>f</sup>                                                                                | This work            |
| KM-263  | KM-222, <i>rad52<math>\Delta</math>::kanMX4</i>                                                                                             | This work            |
| KM-265  | KM-201, <i>rad52<math>\Delta</math>::kanMX4</i>                                                                                             | This work            |
| KM-267  | KM-203, <i>rad52<math>\Delta</math>::kanMX4</i>                                                                                             | This work            |
| KM-269  | KM-221, <i>rad51<math>\Delta</math>::kanMX4</i>                                                                                             | This work            |
| KM-271  | KM-222, <i>rad51<math>\Delta</math>::kanMX4</i>                                                                                             | This work            |
| KM-273  | KM-201, <i>rad51<math>\Delta</math>::kanMX4</i>                                                                                             | This work            |
| KM-275  | KM-203, <i>rad51<math>\Delta</math>::kanMX4</i>                                                                                             | This work            |
| KM-277  | KM-221, <i>pol32<math>\Delta</math>::kanMX4</i>                                                                                             | This work            |
| KM-279  | KM-222, <i>pol32<math>\Delta</math>::kanMX4</i>                                                                                             | This work            |
| KM-281  | KM-201, <i>pol32<math>\Delta</math>::kanMX4</i>                                                                                             | This work            |
| KM-283  | KM-203, <i>pol32<math>\Delta</math>::kanMX4</i>                                                                                             | This work            |
| KM-315  | KM-201, <i>rad59<math>\Delta</math>::kanMX4</i>                                                                                             | This work            |
| KM-317  | KM-203, <i>rad59<math>\Delta</math>::kanMX4</i>                                                                                             | This work            |
| KM-319  | KM-221, <i>rad59<math>\Delta</math>::kanMX4</i>                                                                                             | This work            |
| KM-321  | KM-222, <i>rad59<math>\Delta</math>::kanMX4</i>                                                                                             | This work            |
| KM-323  | KM-201, <i>mph1<math>\Delta</math>::kanMX4</i>                                                                                              | This work            |
| KM-325  | KM-203, <i>mph1<math>\Delta</math>::kanMX4</i>                                                                                              | This work            |
| KM-327  | KM-221, <i>mph1<math>\Delta</math>::kanMX4</i>                                                                                              | This work            |
| KM-329  | KM-222, <i>mph1<math>\Delta</math>::kanMX4</i>                                                                                              | This work            |
| KM-331  | KM-201, <i>srs2<math>\Delta</math>::kanMX4</i>                                                                                              | This work            |
| KM-333  | KM-203, <i>srs2<math>\Delta</math>::kanMX4</i>                                                                                              | This work            |
| KM-335  | KM-221, <i>srs2<math>\Delta</math>::kanMX4</i>                                                                                              | This work            |
| KM-337  | KM-222, <i>srs2<math>\Delta</math>::kanMX4</i>                                                                                              | This work            |
| KM-339  | KM-201, <i>sgs1<math>\Delta</math>::kanMX4</i>                                                                                              | This work            |
| KM-341  | KM-203, <i>sgs1<math>\Delta</math>::kanMX4</i>                                                                                              | This work            |
| KM-343  | KM-221, <i>sgs1<math>\Delta</math>::kanMX4</i>                                                                                              | This work            |

|        |                               |           |
|--------|-------------------------------|-----------|
| KM-345 | KM-222, <i>sgs1Δ::kanMX4</i>  | This work |
| KM-347 | KM-201, <i>ARS1Δ::kanMX4</i>  | This work |
| KM-349 | KM-203, <i>ARS1Δ::kanMX4</i>  | This work |
| KM-379 | KM-201, <i>rad1Δ::kanMX4</i>  | This work |
| KM-381 | KM-203, <i>rad1Δ::kanMX4</i>  | This work |
| KM-383 | KM-201, <i>rad10Δ::kanMX4</i> | This work |
| KM-385 | KM-203, <i>rad10Δ::kanMX4</i> | This work |
| KM-387 | KM-221, <i>rad1Δ::kanMX4</i>  | This work |
| KM-389 | KM-222, <i>rad1Δ::kanMX4</i>  | This work |
| KM-391 | KM-221, <i>rad10Δ::kanMX4</i> | This work |
| KM-393 | KM-222, <i>rad10Δ::kanMX4</i> | This work |

---

<sup>a</sup>GSHU *lys2::AluIR* contains the GSHU cassette (including the I-*SceI* gene under the inducible

*GALI* promoter, the hygromycin resistance gene *hyg*, and the counterselectable marker gene

*KIURA3*) and the I-*SceI* site (HOT site) in *TRP5*.

<sup>b</sup>A3-UR amplicon cassette derivative from YRpKM1 plasmid containing an autonomous replicating sequence (*ARS1*), bacterial origin of replication (ORI), ampicillin resistance gene (*Amp<sup>R</sup>*), the green fluorescence protein (GFP) gene and the split *URA3* gene (A3-UR).

<sup>c</sup>*LEU2* is integrated downstream of UR.

<sup>d</sup>GSHdw cassette (including the I-*SceI* gene under the inducible *GALI* promoter and *hyg*) and the I-*SceI* (HOT) site are integrated 10 kb downstream of the UR sequence.

<sup>e</sup>GSHup cassette (including the I-*SceI* gene under the inducible *GALI* promoter and *hyg*) and the I-*SceI* (HOT) site are integrated 10 kb upstream of the A3 sequence.

<sup>f</sup>Single deletion strains contain the *kanMX4* module in place of the chosen gene, and are all derivatives of KM-201,203 or KM-221,222 strains.
