# Supplementary material for: A Mechanism of Gene Amplification Driven by Small DNA Fragments
Source: PubMed Central journal article supplement (PMC3521702; doi:10.1371/journal.pgen.1003119), 2012-12-13
Supplement: pgen.1003119.s007.pdf [file pgen.1003119.s007.pdf]

**Table S3. SFDA driven by oligos with homology as short as 20 bases.**

| Strain                              | No oligo    | A20B60 <sub>s</sub> | C60D20 <sub>s</sub> | A20B60 <sub>s</sub> +C60D20 <sub>s</sub> |
|-------------------------------------|-------------|---------------------|---------------------|------------------------------------------|
| No DSB                              |             |                     |                     |                                          |
| KM-201,203 (WT)                     | <0.01 (0-0) | 0.06 (0-0.2)        | 0.06 (0-0.2)        | 0.06 (0-0.2)                             |
| KM-339,341 ( $\Delta$ <i>sgsI</i> ) | <0.01 (0-0) | 0.1 (0-0.4)         | 0.1 (0-0.4)         | 0.3 (0-1)                                |
| DSB                                 |             |                     |                     |                                          |
| KM-221,222 (WT)                     | <0.01 (0-0) | 0.06 (0-0.2)        | <0.01 (0-0)         | 0.05 (0-0.1)                             |
| KM-343,345 ( $\Delta$ <i>sgsI</i> ) | <0.01 (0-0) | 0.1 (0-0.3)         | <0.01 (0-0)         | 1 (0.5-2)                                |

Mean of Ura<sup>+</sup> colonies per 10<sup>7</sup> viable cells obtained after transformation of wild-type and *sgsI* mutant cells with no oligos, A20B60<sub>s</sub>, C60D20<sub>s</sub> or A20B60<sub>s</sub> + C60D20<sub>s</sub> oligos from six determinations; the range is shown in parenthesis.
